# Supplementary material
Source: publisher figshare collection journal article supplement (https://brill.figshare.com/ndownloader/files/14478965)
Supplement: Supplementary file 1 [file 14478965]

Lecture One Handout

**Recent Challenges to Conceptual Metaphor Theory**

**The issue of methodology**

intuitive and unsystematic

problematic in two ways

supraindividual level

individual level

subindividual level

**The issue of the direction of analysis**

top-down or bottom-up

two objections against the top-down approach: the principle of “the dominance of irregularity” and the goal to identify each and every linguistic and conceptual metaphor relating to a particular target domain.

Central to our approach is the idea that even if the production of CFUs [conventional figurative units] is governed by some general principles of human cognition, they remain, above all, irregular units of the lexicon. Thus, the most salient features of their semantic structure and discursive behaviour cannot be captured by metalinguistic tools aimed at exclusively discovering regular characteristics. Large portions of CFUs came into being under the influence of certain culture-specific phenomena. (Dobrovolskij and Piirainen, 2005, pp. 355-356)

*split hairs*.

*add fuel to the fire* and *flare up*, as in “His stupid comment just *added fuel to the fire*” and “The argument *flared up* between them.”

Source: Target:

the degree of heat  the degree of intensity

the cause of heat  the cause of intensity

increase in the degree of heat  increase in the degree of intensity

decrease in the degree of heat  decrease in the degree of intensity

heat drops to zero  intensity ceases

*add fuel to the fire*: ‘the cause of heat  the cause of intensity’

*flare up*: ‘increase in the degree of heat  increase in the degree of intensity’

Second objection: overall goal in metaphor analysis should be to find each and every linguistic and conceptual metaphor relating to a target in a given corpus.

Why is it so important for us to find metaphors for particular target domains?

To be able to see to what extent and with which content the metaphors contribute to the conceptualization of abstract concepts.

quantitative advantage does not necessarily lead to a qualitative advantage.

*anger, fear, happiness, sadness*, and *disgust* in the British National Corpus.

EMOTIONS ARE OPPONENTS, EMOTIONS ARE NATURAL FORCES, EMOTION IS INSANITY (control, passivity, lack of control).

EMOTIONAL) STATES ARE CONTAINERS, (EMOTIONAL) STATES ARE OBJECTS, CAUSES (OF EMOTIONS) ARE FORCES, and (EMOTIONAL) CHANGE IS MOTION.

**The issue of schematicity**

THEORIES/ ARGUMENTS ARE BUILDINGS

However, the metaphor is actually less schematic in both source and target domains than this new formulation (rational arguments are buildings). … the formula the convincingness of an argument is the physical integrity of a building best characterizes the metaphor at its appropriate level of schematicity. (Clausner and Croft, 1997, p. 260)

What then is the appropriate level of schematicity for conceptual metaphors?

LOVE IS A JOURNEY: VEHICLE, not at the level of SHIP or TRAIN.

RELATIONSHIP and VEHICLE, and not between SHIP and RELATIONSHIP or TRAIN and RELATIONSHIP.

if they were on the superordinate level, the basic-level concepts belonging to the same source domain that have similar meanings would merely be alternative manifestations of high-level mappings (and as such would have to be interchangeable), since the same mapping would apply to them.

However, Zinken suggest some apparent examples where this is not the case: *way* and *course* belonging to the domain of PATH, *ship* and *boat* to that of TRANSPORTATION, and *kettle* and *pot* to that of CONTAINER.

the scope of the source and main meaning focus.

BUILDING applies to any member of the target domain of COMPLEX ABSTRACT SYSTEM. one of the meaning foci associated with the source domain of BUILDING is that of structure: A COMPLEX ABSTRACT SYSTEM IS A COMPLEX PHYSICAL OBJECT

CONTAINER: ABSTRACT TENSION IS PHYSICAL PRESSURE.  KETTLE, not POT.

WAY and COURSE.

WAY: MEANS (OF ACTION) ARE PATHS.

COURSE: SCHEDULING HOW TO ACHIEVE ONE’S PURPOSE IS SCHEDULING HOW TO REACH ONE’S DESTINATION.

*boat*: STATES ARE CONTAINERS

*ship*: LONG-TERM PURPOSEFUL ACTIVITIES ARE LONG JOURNEYS and COMPLEX ABSTRACT SYSTEMS ARE COMPLEX PHYSICAL OBJECTS.

**The issue of embodiment**

a theory that builds on image schemas and, in general, on the universality of essential physical experiences cannot in the same breath be a theory of cultural variation

The thing is that reductionism and relativism are not supposed to go together. The failure to balance these two tendencies is, I believe, the second drawback of the philosophy of embodied realism. (Rakova, 2001: 228)

Thus, my claim is that experientialism is often relativism in the strong sense, and that the supposed universality of directly meaningful concepts and kinesthetic image schemas is not consistent with the idea of culturally defined conceptualizations. (Rakova, 2001: 228)

The claim that there are cognitively significant cultural differences in the conceptualization of spatial relations is incompatible with the naturalistic stand that follows from the theory of image schemas. (Rakova, 2001: 238)

“differential experiential focus” (see Kövecses, 2005).

rise in body temperature and increase in blood pressure: English, Hungarian.

pressure: Chinese.

undifferentiated and generalized state of physiological arousal: Ilongot.

HEAT: 850 and 950.

PRESSURE

HEAT and PRESSURE: ANGER IS A HOT FLUID IN A CONTAINER.

**The issue of the relationship between metaphor and culture**

Can CMT simultaneously account for both the universal and culture-specific aspects of metaphorical conceptualization?

principle of coherence: the pressure of embodiment and the pressure of context.

Boers (1999): ECONOMY IS HEALTH

Topic:

Sepp Blatter, the Swiss president of the International Football Federation (FIFA), wrote a letter to the leaders of the Asian Football Association (AFC), in which he deemed unacceptable the behavior of the association’s delegates three weeks ago when they left the FIFA Congress prematurely. On the other hand, he promised that he would try to help solve the problems with which AFC is struggling—the German news agency dpa reported.

I was bitterly disappointed by your behavior at our Congress held in Los Angeles. You, as experts on football, should have known that the team that leaves the field before the game is called off by the referee can never win the game—states the letter. (my translation, ZK)

Personal history:

We are, we can be at home in Europe. Since Saint Stephen we have been *integrated/ connected* to this intellectual/ spiritual *electric circuit*, and *with varying degrees of intensity*, but we have been in it – even though various powers, for more or less time, have tried to yank us out of it (my translation, ZK)

EUROPEAN UNION AS AN ELECTRIC CIRCUIT

**Conclusions**

supraindividual level vs. individual level

regularity – irregularity; quantitative – qualitative

schematicity: meaning foci

embodiment: differential experiential focus

cultural variation: pressure of universal embodiment and pressure of local context

**References**

Alverson, H. 1994. *Semantics and Experience. Universal Metaphors of Time in Tnglish, Mandarin, Hindi, and Sesotho.* Johns Hopkins University Press.

Boers, F. 1999. When a bodily source domain becomes prominent. In R. Gibbs and G. Steen (eds.): *Metaphor in Cognitive Linguistics.* Amsterdam: John Benjamins. 47–56.

Clausner, T. and Croft, W. 1997. Productivity and schematicity in metaphors. *Cognitive Science,* vol. 21 (3), 247–282.

Dobrovolskij, D. and Piirainen, E. 2005. *Figurative Language: Cross-cultural and Cross-linguistic Perspective.* Amsterdam: Elsevier.

Ekman, P., Levenson, R. W., and Friesen, W. V. 1983. Autonomic nervous system activity distinguishes among emotions. *Science* 221, 1208–1210.

Gevaert, C. 2001. Anger in old and middle english: a ’hot’ topic? *Belgian Essays on Language and Literature.* 89–101.

Gevaert, C. 2005. The anger is heat question: detecting cultural influence on the conceptualization of anger through diachronic corpus analysis. N. Delbacque, J. Van der Auwera, and G. Geeraerts, eds., *Perspectives on Variation: Sociolinguistic, Historical, Comparative.* Berlin: Mouton de Gruyter. 195-208.

Kövecses, Z. 1995. American friendship: the scope of metaphor. *Cognitive Linguistics*.

Kövecses, Z. 2000. The scope of metaphor. In A. Barcelona, ed., *Metaphor and Metonymy at the Crossroads*. Berlin: Mouton.

Kövecses, Z. 2002. *Metaphor. A Practical Introduction*. Oxford: Oxford University Press.

Kövecses, Z. 2005. *Metaphor in Culture. Universality and Variation.* Cambridge: Cambridge University Press.

## Kövecses, Z. forthcoming. Methodological issues in conceptual metaphor theory. In S. Handl and H-J. Schmid, eds., *Windows to the mind: Metaphor, metonymy and conceptual blending*, To be published in the series Cognitive Linguistics Research, Walter de Gruyter, Berlin – New York.

Lakoff, G. and Johnson, M. 1980. *Metaphors We Live By.* Chicago: University of Chicago Press.

Lakoff, G. and Kövecses, Z. 1987. The cognitive model of anger inherent in American English. In D. Holland and N. Quinn (eds.): *Cultural Models in Language and Thought.* Cambridge: Cambridge University Press. 195–221.

Pragglejaz Group. 2007. MIP: A method for identifying metaphorically used words in discourse. *Metaphor & Symbol* 22(1) 1-39.

Rakova, M. 2002. The philosophy of embodied realism: a high price to pay? *Cognitive Linguistics* 13–3, 215–244.

Rosaldo, M. Z. 1980. *Knowledge and Passion. Ilongot Notions of Self and Social Life.* Cambridge: Cambridge University Press.

Steen, G. 1999. From linguistic to conceptual metaphor in five steps. In R. Gibbs and G. Steen (eds.): *Metaphor in Cognitive Linguistics.* Amsterdam: John Benjamins. 57–77.

Stefanowitch, A. 2007. Words and their metaphors. A corpus-based approach. In A. Stefanowitch and S. Th. Gries, eds., *Corpus-based Approaches to Metaphor and Metonymy*. Berlin: Mouton de Gruyter. 63-105.

Yu, N. 1998. *The Contemporary Theory of Metaphor. A Perspective from Chinese.* Amsterdam: John Benjamins.

Zinken, J. n.d. Levels of schematicity in metaphor: basic level source concepts. <http://www.port.ac.uk/departments/academic/psychology/research/ecologycultureandcommunication/filetodownload,23361,en.fdf>.
